# Supplementary material
Source: publisher figshare collection journal article supplement (https://sage.figshare.com/ndownloader/files/14150381)
Supplement: Supplementary file 1 [file 14150381]

## Study 1 Materials

**IRMAS (identical items were used in all studies in which RMA was measured)**

Please indicate the degree to which you agree with the following statements.

|                                                                                                                  | Strongly<br>Disagree  | Disagree              | Neither<br>Agree nor<br>Disagree | Agree                 | Strongly<br>Agree     |
|------------------------------------------------------------------------------------------------------------------|-----------------------|-----------------------|----------------------------------|-----------------------|-----------------------|
| If a woman is raped while she is drunk, she is at least somewhat responsible for letting things get out of hand. | <input type="radio"/> | <input type="radio"/> | <input type="radio"/>            | <input type="radio"/> | <input type="radio"/> |
| When women go to parties wearing "slutty" clothes, they are asking for trouble.                                  | <input type="radio"/> | <input type="radio"/> | <input type="radio"/>            | <input type="radio"/> | <input type="radio"/> |
| If a woman goes to a room alone with a man at a party, it is her own fault if she is raped.                      | <input type="radio"/> | <input type="radio"/> | <input type="radio"/>            | <input type="radio"/> | <input type="radio"/> |
| If a woman acts like a slut, eventually she is going to get into trouble.                                        | <input type="radio"/> | <input type="radio"/> | <input type="radio"/>            | <input type="radio"/> | <input type="radio"/> |
| When a woman is raped, it's often because the way she said "no" was unclear.                                     | <input type="radio"/> | <input type="radio"/> | <input type="radio"/>            | <input type="radio"/> | <input type="radio"/> |
| If a woman initiates kissing or hooking up, she should not be surprised if a                                     | <input type="radio"/> | <input type="radio"/> | <input type="radio"/>            | <input type="radio"/> | <input type="radio"/> |

|                                                                                                         |                       |                       |                       |                       |                       |
|---------------------------------------------------------------------------------------------------------|-----------------------|-----------------------|-----------------------|-----------------------|-----------------------|
| man assumes she wants to have sex.                                                                      |                       |                       |                       |                       |                       |
| When men rape, it is usually because of their strong desire for sex.                                    | <input type="radio"/> |
| Men don't usually intend to force sex on a woman, but sometimes they get too sexually carried away.     | <input type="radio"/> |
| Sex happens when a man's sex drive goes out of control.                                                 | <input type="radio"/> |
| If a man is drunk, he might rape someone unintentionally.                                               | <input type="radio"/> |
| It shouldn't be considered rape if a man is drunk and doesn't realize what he was doing.                | <input type="radio"/> |
| If both people are drunk, it can't be rape.                                                             | <input type="radio"/> |
| If a woman doesn't physically resist sex - even with protesting verbally - it can't be considered rape. | <input type="radio"/> |
|                                                                                                         | <input type="radio"/> |

|                                                                                          |                       |                       |                       |                       |                       |
|------------------------------------------------------------------------------------------|-----------------------|-----------------------|-----------------------|-----------------------|-----------------------|
| If a woman doesn't physically fight back, you can't really say it was rape.              |                       |                       |                       |                       |                       |
| A rape probably doesn't happen if a woman doesn't have any bruises or marks.             | <input type="radio"/> |
| If the accused "rapist" doesn't have a weapon, you really can't call it rape.            | <input type="radio"/> |
| If a woman doesn't say "no" she can't claim rape.                                        | <input type="radio"/> |
| A lot of times, women who say they were raped agreed to have sex and then regret it.     | <input type="radio"/> |
| Rape accusations are often used as a way of getting back at men.                         | <input type="radio"/> |
| A lot of times, women who say they were raped often led the man on and then had regrets. | <input type="radio"/> |
| A lot of times, women who claim they were raped have emotional problems.                 | <input type="radio"/> |

|                                                                                |                       |                       |                       |                       |                       |
|--------------------------------------------------------------------------------|-----------------------|-----------------------|-----------------------|-----------------------|-----------------------|
| Women who are caught cheating on their boyfriends sometimes claim it was rape. | <input type="radio"/> |
|--------------------------------------------------------------------------------|-----------------------|-----------------------|-----------------------|-----------------------|-----------------------|

## Scenario

Please carefully read the following scenario. You will be asked some questions about the scenario later in this survey

---

A young female student has reported being raped early Tuesday morning. The 21-year-old, who planned to graduate later this year, claimed that a man she met the night before had taken advantage of her. According to the report, she met the man at a party thrown by a mutual friend. They made an instant connection and spent the majority of the night talking, dancing, and flirting with one another.

At the end of the party, the man invited the woman over to his apartment to talk more and have some coffee. When they got to his room, the woman said they playfully kissed and caressed each other until the man offered to get her a drink. The woman asserts she began to feel 'strange' and 'disoriented' soon after. She remembers the man trying to take her clothes off, at which point she repeatedly said no and told him to stop. However he did not listen and instead began to use force. She states the next thing she remembers is waking up in the early morning with no clothes on. She then left the apartment and filed a report at the local police station.

Officials questioned a male student at the same university later that afternoon, after being identified as the offender by the woman. Reports from those who knew him described him as being from a "nice, middle-class background". The man claimed to be innocent and stated that the sex was consensual, according to sources.

## Filler task

Please carefully read the following news story. You will be asked some questions about the article later in this survey.

---

Drinking three to five cups of a coffee a day could reduce risk of heart attacks, study finds.

People who drink between three and five cups of coffee a day could be reducing their risk of a heart attack, as they are less likely to develop clogged arteries, according to a new study.

Though there has been much debate around effects of excessive coffee drinking on cardiovascular health, the study found that coffee consumption could be “inversely associated” with the risk of cardiovascular disease.

Researchers led by the Kangbuk Samsung Hospital in Seoul, South Korea, focused on the association between coffee and coronary artery calcium (CAC), which is an early indicator of the potentially serious condition coronary atherosclerosis.

The condition sees arteries become clogged up by fatty substances called plaques or atheroma. It can cause a heart attack or a stroke when the arteries become hardened or narrowed, leading to blood clots, which can then trigger the potentially deadly attacks.

Researchers studied a group of more than 25,000 Korean men and women with no signs of heart disease and an average age of 41.

They found the prevalence of detectable CAC was 13.4% amongst the whole group while the average amount of coffee drunk was 1.8 cups per day.

Their findings showed the calcium ratios were 0.77 for people who had less than one cup per day, 0.66 for those having one to three cups every day, 0.59 for those consuming three to five cups per day, and 0.81 for people having at least five cups or more every day compared with non-coffee drinkers.

The U-shaped findings meant that those who drank one to three coffees a day had the second least prevalence of arteries that had clogged up.

The findings were published in the online journal *Heart*, where the authors stated: “Our study adds to a growing body of evidence suggesting that coffee consumption might be inversely associated with cardiovascular disease risk.

“Further research is warranted to confirm our finding and establish the biological basis of coffee’s potential preventative effects on coronary artery disease.”

The research appears to support the findings of a 2012 set of studies, which the NHS said suggested that, “compared to no coffee consumption, four to five servings of coffee a day was associated with an 11 per cent lower risk (of heart failure),” while “drinking excessive amounts of coffee had no benefit – and is likely to give you the jitters,” though the health service said information should be viewed with caution.

In response to the current study, Victoria Taylor, senior dietitian at the British Heart Foundation, said: “While this study does highlight a potential link between coffee consumption and lower risk of developing clogged arteries, more research is needed to confirm these findings and understand what the reason is for the association.”

We need to take care when generalising these results because it is based on the South Korean population, who have a different diet and lifestyle.”

### **Reconstructive memory items (the same items were used in Study 5)**

The following questions ask you to remember details about the scenario you read earlier concerning the male and female who were at the party. Please try to remember the situation described in the story the best you can. If you can't remember specific details, please provide your best guess. Please select the advance button to continue.

M1 How many alcoholic drinks did the female student have that evening?

- ☐ 0
- ☐ 1
- ☐ 2
- ☐ 3
- ☐ 4
- ☐ 5 or more

M2 How many alcoholic drinks did the male student have that evening?

- ☐ 0
- ☐ 1
- ☐ 2
- ☐ 3
- ☐ 4
- ☐ 5 or more

M3R How many times did the female student say 'no' to the male student?

- ☐ 0
- ☐ 1
- ☐ 2
- ☐ 3
- ☐ 4
- ☐ 5 times or more

M4R Did the male student use force on the female student? If so, what level of force was used?

- ☐ None
- ☐ A little force
- ☐ More than a little force
- ☐ Moderate force
- ☐ Much force
- ☐ Extreme force

M5 If the male student used force, how 'playful' was the force reported as being?

- ☐ None used or Not at all
- ☐ A little playful
- ☐ Somewhat playful
- ☐ Moderately playful
- ☐ A great deal playful
- ☐ Extremely playful

M6 How long did it take before the female student reported the incident to the police?

- ☐ A few hours
- ☐ A day
- ☐ A couple of days
- ☐ A few days
- ☐ A week
- ☐ A couple of weeks

**Victim blame (identical items were used in studies 2, 4, & 5)**

These questions concern your opinions about the scenario you read earlier involving the young man and women who left together after the party.

[illegible]

[illegible]



## **Study 2 Materials (Parts 1 & 2)**

**Part 1 - IRMAS (see above)**

**Part 1 – Scenario & Photo**

Please carefully read the following scenario and study the crime-scene photo underneath. You will be asked some questions about the scenario later in this survey and in the second part in a few days time.

---

A young female student has reported being raped early Tuesday morning. The 21-year-old, who works part time at a local pub, claimed that a man she met the night before had taken advantage of her. According to the report, she met the man at a gathering at the house of a mutual friend. They made an instant connection and spent the majority of the night hanging out and making jokes with one another.

At the end of the evening, the man and woman went over to her apartment. When they got to her room, the woman said they kissed and caressed each other. She said that the man proposed sex and she replied that she was unsure as they had only just met. She recalls that they had one drink together, after which she began to feel 'strange' and 'disoriented'. The woman alleges that the man at some point spiked her drink, most likely whilst she was in the bathroom.

She stated that, as they lay together on the sofa, the man unexpectedly began to remove her clothes, and became increasingly insistent in his attempts to do so. She states that things became very hazy at this point and, although she does not recall exactly what happened, she is certain that, in spite of her unwillingness, the man proceeded to have intercourse with her. She states that the next thing she remembers is waking up in the early morning with no clothes on. She then left the apartment and filed a report at the local police station later the same day.

The police questioned a male student at the same university later that afternoon, after being identified as the offender by the woman. Reports from those who knew him described him as being from a "nice, middle-class background". The man claimed to be innocent and stated that the sex was consensual, according to sources.

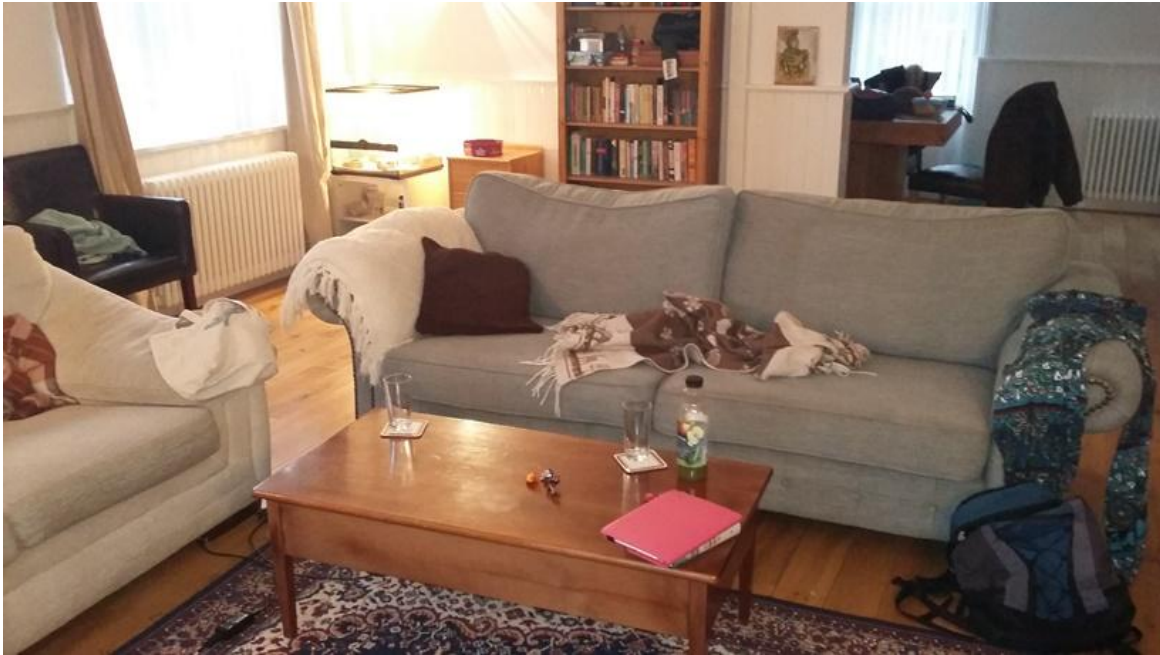

### **Part 1 – T1 victim blame items (see above - as per Study 1)**

### **Part 2 – Reconstructive memory (scenario details)**

In the following questions, you will be asked to recall some details about the scenario you read a few days ago about a rape allegation.

The scenario is repeated across the 12 questions below, but some of the details are missing. Your task is to accurately "fill in the blanks" by completing the sentence fragments to exactly match the original wording of the scenario.

For each item below, read the sentence fragment and then select the choice underneath that exactly matches what was originally said in the scenario you previously read.

Mscn1 A young female student has reported being raped early Tuesday morning. The 21-year-old, who works part time at a local ...

- ☐ primary school
- ☐ strip club

Mscn2 ... claimed that a man she met the night before had taken advantage of her. According to the report, she met the man at ...

- ☐ a book club meeting at the house of a mutual friend.
- ☐ a cocktail party at the house of a mutual friend.

Mscn3 They made an instant connection and spent the majority of the night ...

- ☐ discussing politics and getting to know one another.
- ☐ flirting and drinking with one another.

Mscn4 At the end of the evening ...

- ☐ the man asked if he could come over to her apartment.
- ☐ the woman asked the man over to her apartment.

Mscn5 When they got to her room, the woman said...

- ☐ he began to kiss and caress her.
- ☐ they passionately kissed and petted each other.

Mscn6 She said that the man proposed sex and she replied that ...

- ☐ she didn't want to as they had only just met.
- ☐ it wasn't a good idea as she had a boyfriend.

Mscn7 She recalls that they ...

- ☐ drank a coffee together
- ☐ drank a few glasses of wine together

Mscn8 ... after which she began to feel 'strange' and 'disoriented'. The woman alleges that the man at some point spiked her drink, most likely whilst she was in the bathroom. She stated that, as they ...

- ☐ sat together on the sofa
- ☐ caressed each other on the sofa

Mscn9 ... the man ...

- ☐ forcefully began to remove her clothes
- ☐ playfully began to remove her clothes

Mscn10 ... and became increasingly ...

- ☐ aggressive in his attempts to do so.
- ☐ impassioned in his attempts to do so.

Mscn11 She states that things became very hazy at this point and, although she does not recall exactly what happened, she is certain that ...

- ☐ in spite of her repeated objections, the man proceeded to have intercourse with her.
- ☐ in spite of her not wanting sex, the man proceeded to have intercourse with her.

Mscn12 She states that the next thing she remembers is waking up in the early morning with no clothes on. She then left the apartment and filed a report at the local police station ...

- ☐ immediately.
- ☐ a few days later.

## Part 2 – Reconstructive memory (photo objects)

A selection of items is shown below. Of the 12 items shown, 6 of these items could be seen in the crime-scene photo you were shown last week along with the scenario, and 6 did not appear in the photo. Please tick the box next to the six items that appeared in the photo you were previously shown.

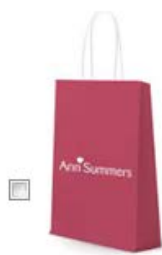

Ann Summers  
bag

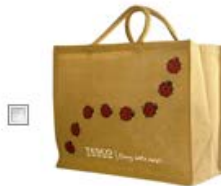

Tesco groceries  
bag

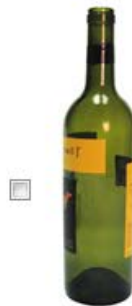

Empty wine  
bottle

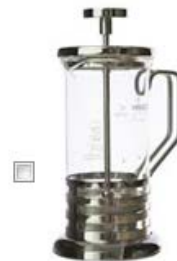

Cafetiere

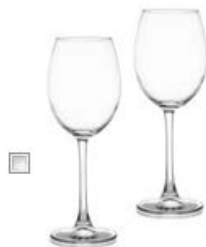

Wine glasses

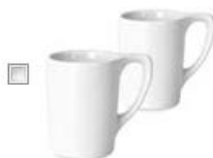

Mugs

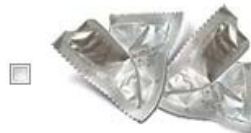

Condom wrappers

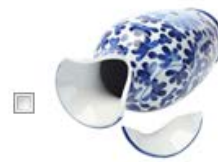

Broken vase

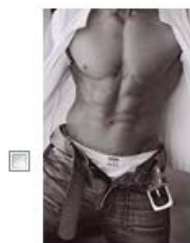

Male torso  
poster

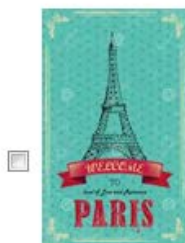

Eiffel Tower  
poster

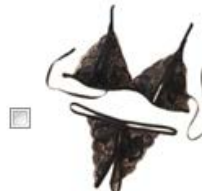

Lingerie

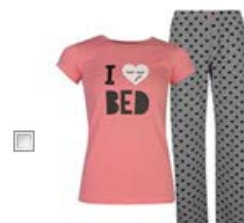

Pyjamas

## Part 2 – T2 victim blame items (see above - as per Study 1)

## Study 3 Materials

### IRMAS (as per Studies 1 & 2))

#### Scenario

Please **carefully** read the following scenario. You will be asked some questions about the scenario later in this survey \_\_\_\_\_

A young female student has reported being raped early Tuesday morning. The 21-year-old, who planned to graduate later this year, claimed that a man she met the night before had taken advantage of her. According to the report, she met the man at a party thrown by a mutual friend. They made an instant connection and spent the majority of the night talking, dancing, and flirting with one another. At the end of the party, the man invited the woman over to his apartment to talk more and have some coffee. When they got to his room, the woman said they playfully kissed and caressed each other until the man offered to get her a drink. The woman asserts she began to feel 'strange' and 'disoriented' soon after. She remembers the man trying to take her clothes off, at which point she repeatedly said no and told him to stop. However he did not listen and instead began to use force. She states the next thing she remembers is waking up in the early morning with no clothes on. She then left the apartment and filed a report at the local police station. Officials questioned a male student at the same university later that afternoon, after being identified as the offender by the woman. Reports from those who knew him described him as being from a "nice, middle-class background". The man claimed to be innocent and stated that the sex was consensual, according to sources.

#### Filler Article (as per Study 1)

#### Recognition Memory Items

The following questions ask you to remember details about the scenario you read earlier concerning the male and female who were at the party.

Please try to remember the situation described in the story the best you can. If you can't remember specific details, please provide your best guess.

Please select the advance button to continue.

On what day of the week did the events take place?

- ☐ Monday
- ☐ Tuesday
- ☐ Wednesday

How long had the female student been at university?

- ☐ She had recently started
- ☐ She was in her second year
- ☐ She was graduating later this year

Why did the male student invite the female student over?

- ☐ For coffee
- ☐ For tea
- ☐ For food

What age was the female student?

- ☐ 20
- ☐ 21
- ☐ 22

At what time of the day was the male student was questioned about the incident?

- ☐ In the morning
- ☐ In the afternoon
- ☐ In the evening

Where did the male student live?

- ☐ In an apartment
- ☐ In a house
- ☐ In a university dorm room

## Study 4 Materials

### Scenario & photo

Please carefully read the following scenario and examine the crime scene photo. You will be asked some questions about the scenario and photo later in this survey

---

A young female student has reported being raped early Tuesday morning. The 21-year-old, who planned to graduate later this year, claimed that a man she met the night before had taken advantage of her. According to the report, she met the man at a party thrown by a mutual friend. They made an instant connection and spent the majority of the night talking, dancing, and flirting with one another.

At the end of the party, the man invited the woman over to his apartment to talk more. When they got to his room, the woman said they playfully kissed and caressed each other until the man offered to get her a drink. The woman asserts she began to feel 'strange' and 'disoriented' soon after. She remembers the man trying to take her jeans off, at which point she repeatedly said no and told him to stop. However he did not listen and instead began to use force. She states the next thing she remembers is waking up in the early morning with no clothes on. She then left the apartment and filed a report at the local police station.

Officials questioned a male student at the same university later that afternoon, after being identified as the offender by the woman. Reports from those who knew him described him as being from a "nice, middle-class background". The man claimed to be innocent and stated that the sex was consensual, according to sources.

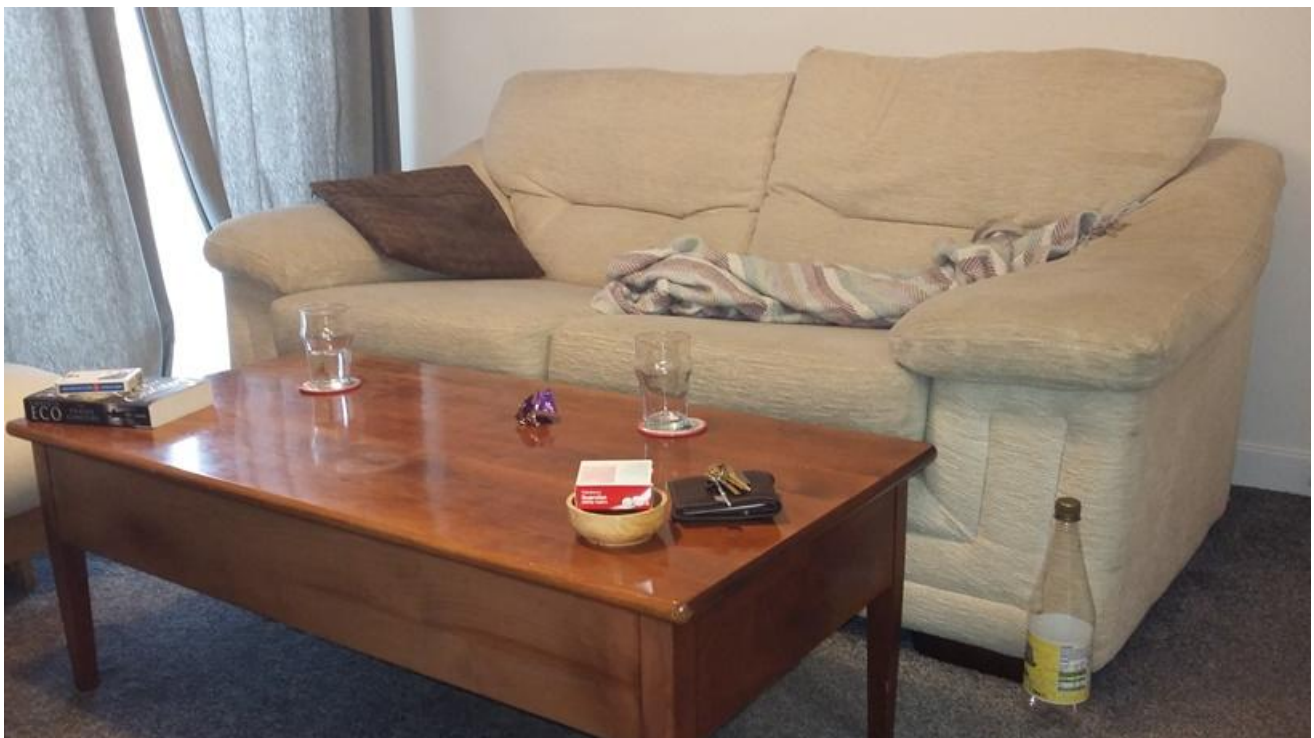



**Mental arithmetic filler task (only examples are provided below for brevity – there were 75 items in total)**

Please work on the following math problems, without the aid of a calculator. Complete as many as you can in 4 minutes. The page will automatically advance only after 4 minutes.

Q41  $124 + 15$

Q43  $134 + 29$

Q45  $75 + 12$

Q47  $58 + 109$

Q49  $88 + 20$

**Control condition – Control/non-leading (CQ) and filler (FQ) questions**

The following questions ask you to remember some details about the scenario and photo you saw earlier.

Please try to recall the details as accurately as possible. If you can't remember specific details, please provide your best guess.

CQ1 How full was the bottle by the sofa?

- ☐ Empty
- ☐ About a quarter full
- ☐ About half full

CQ2 How many glasses were on the table?

- ☐ 0
- ☐ 1
- ☐ 2

CQ3 What color was the empty wrapper on the table?

- ☐ Purple
- ☐ Red
- ☐ Blue

CQ4 After the woman filed a police report, what did the police do?

- ☐ Arrested the man
- ☐ Interviewed the man
- ☐ Offered her rape counselling

CQ5 When the man attempted to remove her clothes, did the women tell him to stop?

- ☐ Not once
- ☐ More than once
- ☐ Repeatedly

FQ1 After the party, where did the woman and the accused man go?

- ☐ To his apartment
- ☐ To her apartment
- ☐ To a hotel

FQ2 Approximately how old was the woman?

- ☐ Late teens
- ☐ Early twenties
- ☐ Late twenties

FQ3 What color was the cushion on the sofa?

- ☐ Red
- ☐ Black
- ☐ Brown

FQ4 What was on top of the wallet on the right hand side of the coffee table?

- ☐ Keys
- ☐ A bank card
- ☐ A pen

FQ5 What was the accused man's occupation?

- ☐ Office clerk
- ☐ Student
- ☐ Shop assistant

### Leading questions condition – Leading (LQ) and filler (FQ) questions

The following questions ask you to remember some details about the scenario and photo you saw earlier.

Please try to recall the details as accurately as possible. If you can't remember specific details, please provide your best guess.

LQ1 How full was the wine bottle by the sofa?

- ☐ Empty
- ☐ About a quarter full
- ☐ About half full

LQ2 How many wine glasses were on the table?

- ☐ 0
- ☐ 1
- ☐ 2

LQ3 What color was the empty condom wrapper on the table?

- ☐ Purple
- ☐ Red
- ☐ Blue

LQ4 After the woman filed a police report a few days later, what did the police do?

- ☐ Arrested the man
- ☐ Interviewed the man
- ☐ Offered her rape counselling

LQ5 When the man attempted to remove her short skirt, did the woman tell him to stop?

- ☐ Not once
- ☐ More than once
- ☐ Repeatedly

FQ1 After the party, where did the woman and the accused man go?

- ☐ To his apartment
- ☐ To her apartment
- ☐ To a hotel

FQ2 Approximately how old was the woman?

- ☐ Late teens
- ☐ Early twenties
- ☐ Late twenties

FQ3 What colour was the cushion on the sofa?

- ☐ Red
- ☐ Black
- ☐ Brown

FQ4 What was on top of the wallet on the right hand side of the coffee table?

- ☐ Keys
- ☐ A bank card
- ☐ A pen

FQ5 What was the accused man's occupation?

- ☐ Office clerk
- ☐ Student
- ☐ Shop assistant

### **Critical (FM) and non-critical (RM) memory items**

The following questions ask you to remember some further details about the scenario and photo you saw earlier.

Please try to recall the details as accurately as possible. If you can't remember specific details, please provide your best guess.

FM1 The bottle by the sofa was a:

- ☐ Soft-drink bottle
- ☐ Wine bottle

FM2 The glasses on the table were:

- ☐ Tumblers
- ☐ Wine glasses

FM3 The empty wrapper on the table was a:

- ☐ Condom wrapper
- ☐ Chocolate bar wrapper

FM4 The woman filed a police report:

- ☐ The next morning
- ☐ A few days later

FM5 The evening of the assault, the woman was wearing:

- ☐ A short skirt
- ☐ Jeans

RM1 The woman and the accused met:

- ☐ At a party
- ☐ In a cafe

RM2 The sofa in the photo was:

- ☐ Grey colored
- ☐ Cream colored

RM3 The incident occurred:

- ☐ Early Saturday morning
- ☐ Early Tuesday morning

RM4 The coffee table in the photo was made from:

- ☐ Wood
- ☐ Glass

RM5 The accused man was a:

- ☐ Student
- ☐ Shop assistant

**Victim blame items (see above - as per Studies 1 & 2)**

## Study 5 Materials

**IRMAS (see above)**

### **Scenario**

Please carefully read the following summary of a rape case that went before court last year.

---

A young female student alleges that she was raped during the early hours of Tuesday the 25th of May. The 21-year-old, who plans to graduate later this year, claimed that the defendant, who she met the night before, had taken advantage of her.

According to her testimony, she met the man at a party thrown by a mutual friend. They made an instant connection and spent the majority of the night talking, dancing, and flirting with one another.

At the end of the party, the defendant invited the woman over to his apartment to talk more and have some coffee. When they got to his room, the woman said they playfully kissed and caressed each other until the man offered to get her a drink.

The woman asserts she began to feel 'strange' and 'disoriented' soon after. She remembers the defendant trying to take her clothes off, at which point she repeatedly said no and told him to stop. However he did not listen and instead began to use force. She states the next thing she remembers is waking up in the early morning with no clothes on. She then left the apartment and filed a report at the local police station.

Officials questioned the defendant, a male student at the same university, later that afternoon after he was identified by the woman. A character witness described the man as being from a "nice, middle-class background". He claims to be innocent and maintains that the sex was consensual

### **Scenario ending in low victim blameworthiness condition**

The case was successfully prosecuted and the defendant was sent to prison.

The judge said: "After considering the actions of the defendant and in light of the substantial evidence, my view is that the defendant should be remanded in custody for a substantial period."

Forensic evidence and witness testimony corroborated the account of the incident that the woman gave to the police.

### **Scenario ending in high victim blameworthiness condition**

The case was dismissed from court after the prosecution dropped the charges.

The prosecuting barrister said: "After reviewing the case in light of additional information, my view is that there is no realistic chance of a conviction."

A message to a friend was found on the complainants phone that implied she had made misleading statements to the police. Material was also found on the complainant's phone about her past sex life, including a recent three-in-a-bed incident.

The defendant was found not-guilty and immediately released.

**Filler task (see above - as per Studies 1 & 3)**

**Reconstructive memory items (see above - as per Study 1)**

**Manipulation check**

MC What was the outcome of the court case regarding a rape allegation that you read about earlier?

- ☐ The defendant was found guilty
- ☐ The prosecution dropped the charges
- ☐ The defendant skipped bail
- ☐ I don't remember

## **Study 6 Materials**

**High Blame Scenario:**

Please read the following scenario. You will be asked some questions about the scenario later in this survey

---

A young female student has reported being raped early last Tuesday morning. The 21-year-old, who planned to graduate later this year, claimed that her ex-boyfriend had taken advantage of her.

According to the report, she and the accused were at a party thrown by a mutual friend, and that she went to the party with her current boyfriend.

At the end of the party, she went over to her ex-boyfriend's apartment to talk and have some drinks. When they got to his bedroom, the woman said they playfully kissed and caressed each other on his bed until he offered to get her a drink.

The woman asserts she began to feel 'strange' and 'disoriented' soon after. She remembers her ex-boyfriend trying to take her clothes off, at which point she said no and told him to stop, but that she did not physically resist his advances. She states the next thing she remembers is waking up in the early morning with no clothes on. She then left the apartment and later filed a report at the local police station.

Officials questioned a male student at the same university later in the week, after being identified as the offender by the woman. Reports from those who attended the party described him as being from a "nice, middle-class background", and that given what they know about the woman, they "would not be surprised" if she was fabricating the incident to hurt the accused. The man claimed to be innocent and stated that the sex was consensual, according to sources.

### **Low Blame Scenario:**

Please read the following scenario. You will be asked some questions about the scenario later in this survey

---

A young female student has reported being raped early last Tuesday morning. The 21-year-old, who planned to graduate later this year, claimed that a man she met at a party had taken advantage of her.

According to the report, she and the accused were at a party thrown by a mutual friend, and that she went to the party with friends.

At the end of the party, she went over to the man's apartment to talk and have some drinks. When they got to his living room, the woman said they playfully kissed and caressed each other on his sofa until he offered to get her a drink.

The woman asserts she began to feel 'strange' and 'disoriented' soon after. She remembers the man trying to take her clothes off, at which point she said no and told him to stop, and that she physically resisted his advances. She states the next thing she remembers is waking up in the early morning with no clothes on. She then left the apartment and later filed a report at the local police station.

Officials questioned a male student at the same university later in the week, after being identified as the offender by the woman. Reports from those who attended the party described him as being from a "nice, middle-class background", and that given what they know about the woman, they "would be very surprised" if she was fabricating the incident. The man claimed to be innocent and stated that the sex was consensual, according to sources.

**Filler task (see above - as per Study 4)**

**Reconstructive memory items - as per Study 1, except:**



M1 How drunk was the woman reported as being that evening?

- ☐ Not at all drunk
- ☐ Very slightly drunk
- ☐ Somewhat drunk
- ☐ Quite drunk
- ☐ Very drunk
- ☐ Extremely drunk

M2 How drunk was the man reported as being that evening?

- ☐ Not at all drunk
- ☐ Very slightly drunk
- ☐ Somewhat drunk
- ☐ Quite drunk
- ☐ Very drunk
- ☐ Extremely drunk

**Manipulation check:**

MC1 Which of the following is true of the rape case you reviewed earlier?

- ☐ The accused was the alleged victim's ex-boyfriend
- ☐ The accused was a local DJ
- ☐ The woman met the accused at the house party
- ☐ I don't remember

**Study 6 blame validation study:**

- **Low/high blame scenario, as above**
- **4 blame items, as per Study 1**
- **Manipulation check, as above**
